# Supplementary material for: N-functionalized nitroxy/azido fused-ring azoles as high-performance energetic materials
Source: Royal Society of Chemistry journal article supplement (doi:10.1039/c6ta02384c), 2016-01-01
Supplement: c6ta02384c1.pdf [file c6ta02384c1.pdf]

Electronic Supplementary Information

## **N-Functionalized nitroxy/azido fused-ring azoles as high-performance energetic materials**

Jiaheng Zhang,<sup>1</sup> Ping Yin,<sup>1</sup> Lauren A. Mitchell,<sup>2</sup> Damon A. Parrish,<sup>3</sup> and Jean'ne M. Shreeve<sup>1\*</sup>

<sup>1</sup>Department of Chemistry, University of Idaho, Moscow, Idaho 83844-2343, United States

<sup>2</sup>Department of Chemistry, University of Minnesota, Minneapolis, MN 55455 United States

<sup>3</sup>Naval Research Laboratory, 4555 Overlook Avenue, Washington, D.C. 20375, United States

Corresponding author email: [jshreeve@uidaho.edu](mailto:jshreeve@uidaho.edu)

### **Theoretical calculations**

The heats of formation for **1–6** were determined using the isodesmic reaction approach (**Scheme S1**). The calculations were carried out using Gaussian 03 (Revision D.01) suite of programs.<sup>1</sup> The geometric optimization and frequency analyses of the structures were calculated using B3LYP/6-31+G\*\* level,<sup>2</sup> and single energy points were calculated at the MP2/6-311++G\*\* level.<sup>3</sup> The heats of formation for 1,4-dihydropyrazolo[4,3-c]pyrazole, 4H,8H-bis([1,2,5]oxadiazolo)[3,4-b:3',4'-e]pyrazine, 5H-imidazo[4,5-b][1,2,5]oxadiazolo[3,4-e]pyrazin-6(7H)-one, 2H,2'H-3,3'-bi(1,2,4-triazole), and aminomethyl nitrate were obtained by atomization approach using G2 ab initio method (**Table S1**).<sup>4</sup> The heats of formation for other build block molecules were obtained from the NIST WebBook.<sup>5</sup> Thus, the gas phase enthalpy of the species being investigated can be readily extracted. The enthalpy of sublimation was calculated by using Trouton's rule.<sup>6</sup> Solid state heats of formation of the resulting compounds were calculated with equation (1) in which  $T_{m/d}$  is the melting temperature or decomposition temperature.

$$\Delta H_{f(\text{solid})} = \Delta H_{f(\text{g})} - \Delta H_{\text{sub}} = \Delta H_{f(\text{g})} - 188[\text{J mol}^{-1} \text{K}^{-1}] * T_{m/d} \quad (1)$$

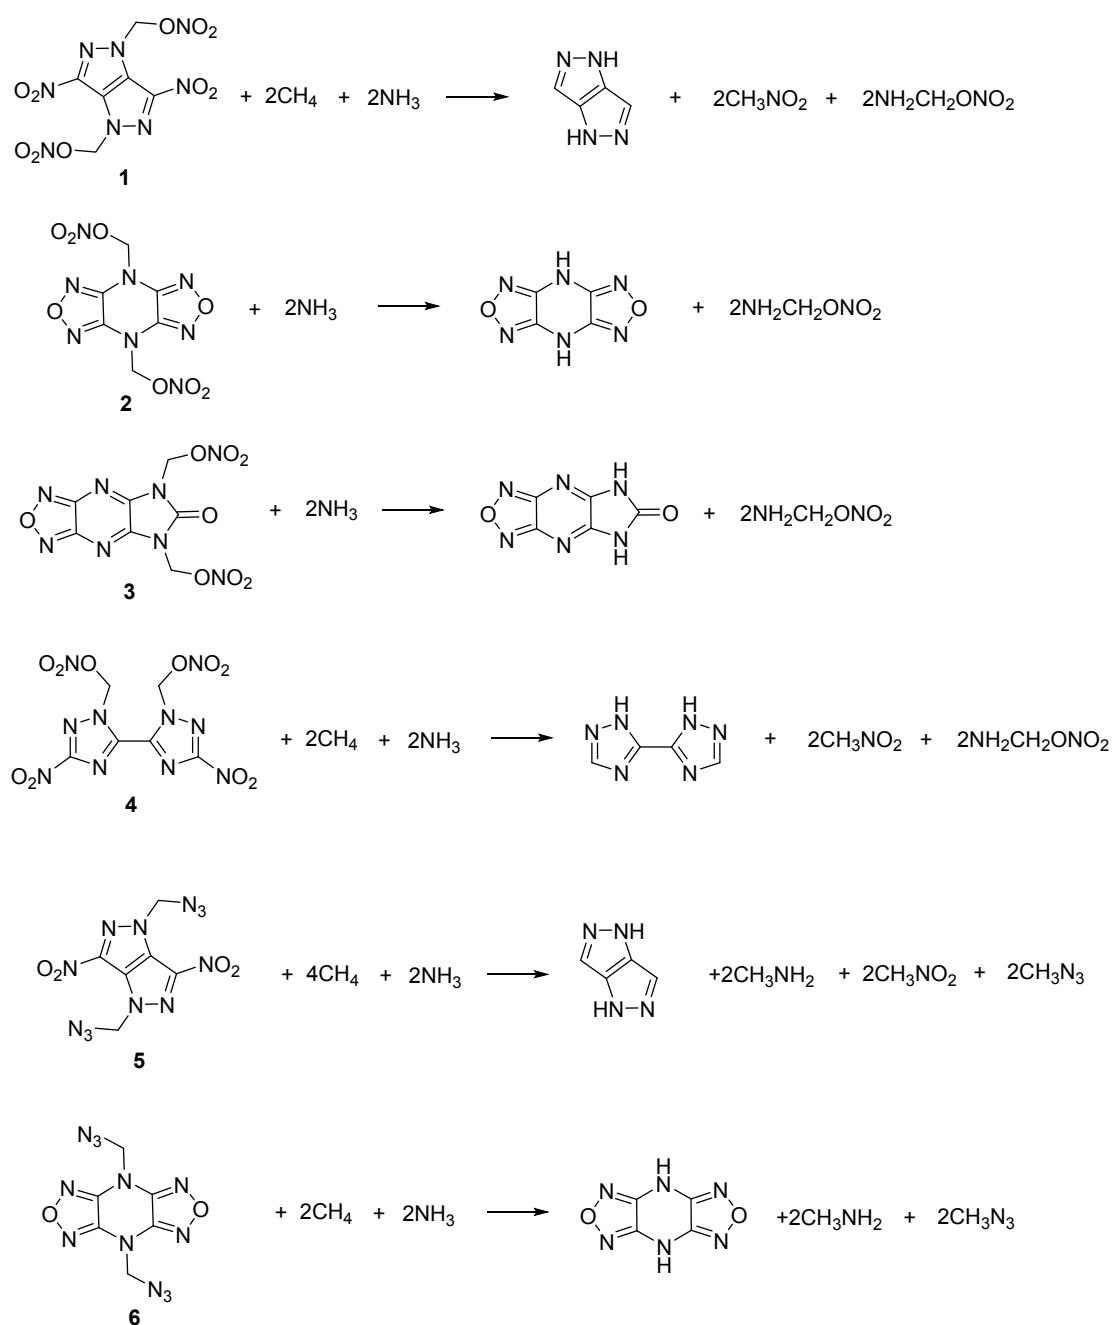

**Scheme S1.** Isodesmic reactions for calculating heats of formation for **1-6**.

**Table S1.** Enthalpies of the gas-phase building block molecules.

| M                                                          | $\Delta H_f^\circ$ (kJ mol <sup>-1</sup> ) |
|------------------------------------------------------------|--------------------------------------------|
| 1,4-dihydropyrazolo[4,3-c]pyrazole                         | 422.17                                     |
| 4H,8H-bis([1,2,5]oxadiazolo)[3,4-b:3',4'-e]pyrazine        | 518.47                                     |
| 5H-imidazo[4,5-b][1,2,5]oxadiazolo[3,4-e]pyrazin-6(7H)-one | 241.10                                     |
| 2H,2'H-3,3'-bi(1,2,4-triazole)                             | 381.40                                     |

---

|                     |         |
|---------------------|---------|
| aminomethyl nitrate | -119.27 |
| methane             | -74.60  |
| ammonia             | -45.90  |
| nitromethane        | -81.00  |
| methanamine         | -23.50  |
| azidomethane        | 296.54  |

---

### Crystal structure analysis

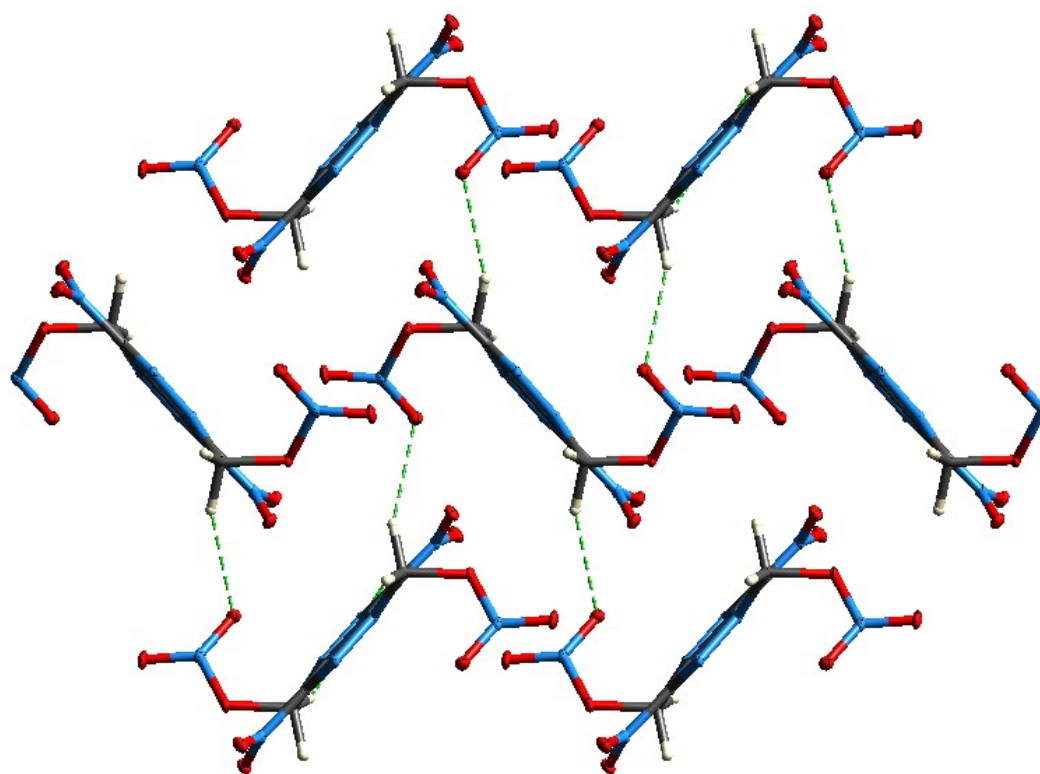

**Figure S1.** Unit cell view of **1** along *a* axis; hydrogen bonds are indicated as dotted lines.

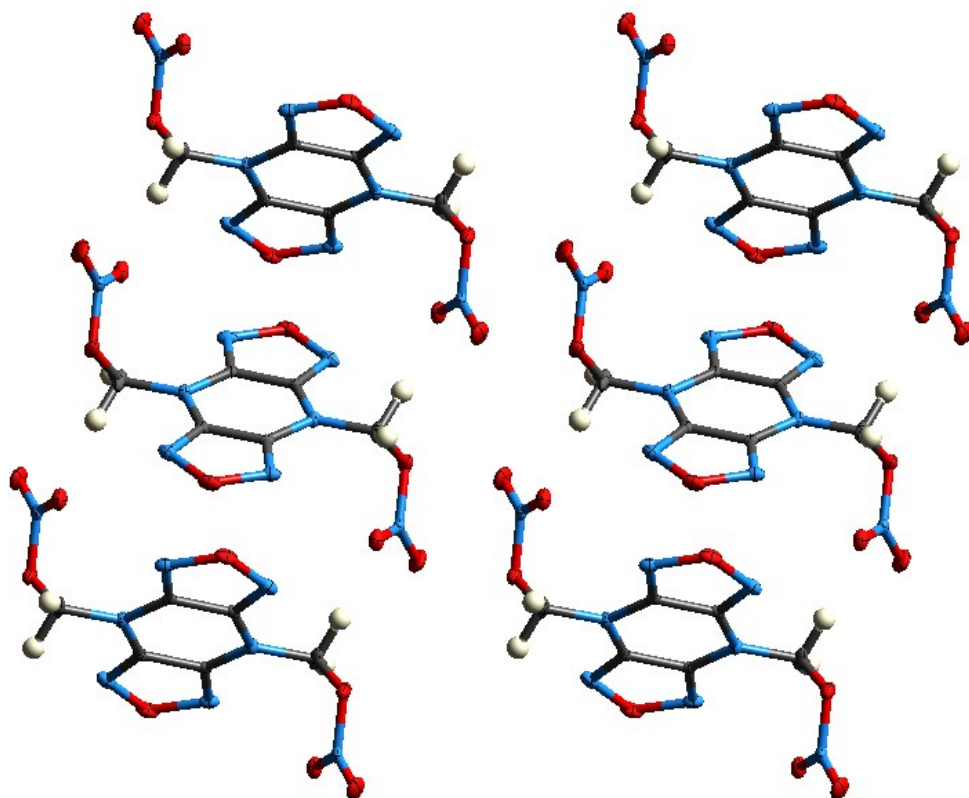

**Figure S2.** Unit cell view of **2** along *b* axis.

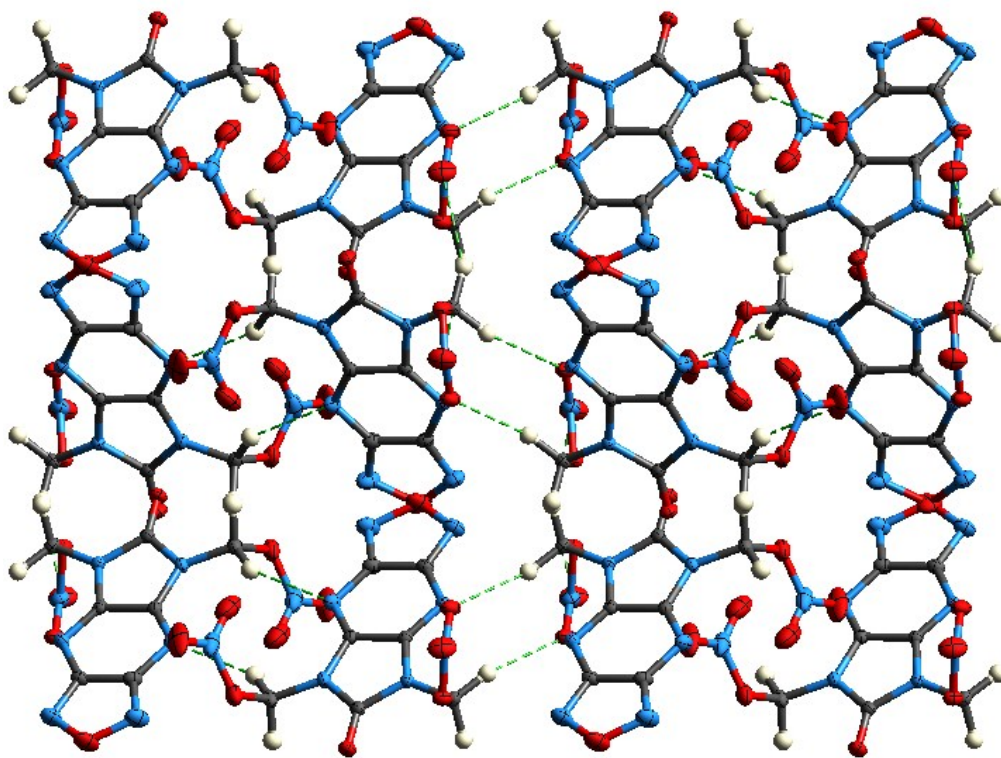

**Figure S3.** Unit cell view of **3** along *c* axis; hydrogen bonds are indicated as dotted lines.

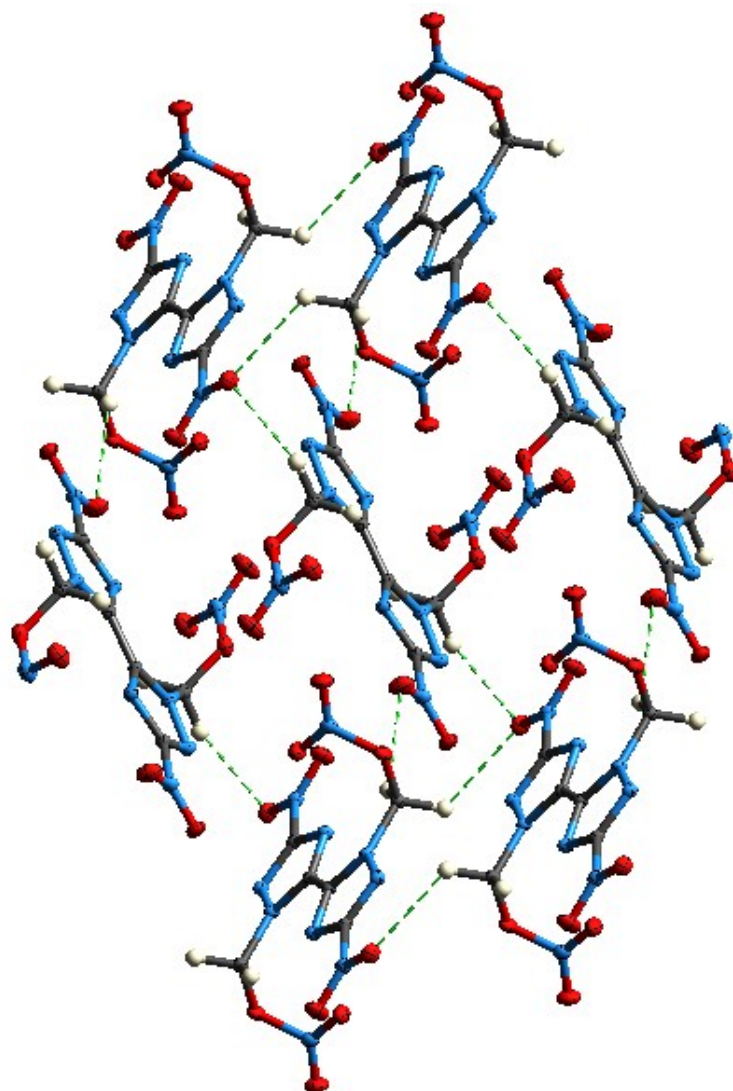

**Figure S4.** Unit cell view of **4** along *b* axis; hydrogen bonds are indicated as dotted lines.

## References

- 1 M. J. Frisch, G. W. Trucks, H. B. Schlegel, G. E. Scuseria, M. A. Robb, J. R. Cheeseman, J. A. Montgomery, T. V. Jr., K. N. Kudin, J. C. Burant, J. M. Millam, S. S. Iyengar, J. Tomasi, V. Barone, B. Mennucci, M. Cossi, G. Scalmani, N. Rega, G. A. Petersson, H. Nakatsuji, M. Hada, M. Ehara, K. Toyota, R. Fukuda, J. Hasegawa, M. Ishida, T. Nakajima, Y. Honda, O. Kitao, H. Nakai, M. Klene, X. Li, J. E. Knox, H. P. Hratchian, J. B. Cross, V. Bakken, C. Adamo, J. Jaramillo, R. Gomperts, R. E. Stratmann, O. Yazyev, A. J. Austin, R. Cammi, C. Pomelli, J. W. Ochterski, P. Y. Ayala, K. Morokuma, G. A. Voth, P. Salvador, J. J. Dannenberg, V. G. Zakrzewski, S. Dapprich, A. D. Daniels, M. C. Strain, O.

Farkas, D. K. Malick, A. D. Rabuck, K. Raghavachari, J. B. Foresman, J. V. Ortiz, Q. Cui, A. G. Baboul, S. Clifford, J. Cioslowski, B. B. Stefanov, A. L. G. Liu, P. Piskorz, I. Komaromi, R. L. Martin, D. J. Fox, T. Keith, M. A. Al-Laham, C. Peng, A. Nanayakkara, M. Challacombe, P. M. W. Gill, B. Johnson, W. Chen, M. Wong, C. Gonzalez, J. A. Pople, Gaussian 03, revision D.01, Gaussian, Inc., Wallingford, CT, 2004.

- 2 R. G. Parr and W. Yang, *Density Functional Theory of Atoms and Molecules*, Oxford University Press, New York, 1989.
- 3 M. Head-Gordon, J. A. Pople, *Chem. Phys. Lett.* 1988, **153**, 503–506.
- 4 J. M. Martin, *Chem. Phys. Lett.* 1996, **259**, 669–678.
- 5 P. J. Linstrom,; Mallard, W. G.; Eds. NIST Chemistry WebBook, NIST Standard Reference Database, 69, National Institute of Standards and Technology, 2005.
- 6 M. S. Westwell, M. S. Searle, D. J. Wales and D. H. Williams, *J. Am. Chem. Soc.*, 1995, **117**, 5013; (b) A. A. Dippold, T. M. Klappötke and N. Winter, *Eur. J. Inorg. Chem.* 2012, **34**, 74.
